# Supplementary material
Source: HighWire-hosted journal article supplement (https://bmjopen.bmj.com/content/11/8/e045795)
Supplement: inline-supplementary-material-3 [file inline-supplementary-material-3.pdf]

Appendix to

## Sibship Size, Birth Order and Risk of Asthma and Allergy: Protocol for a Systematic Review and Meta-Analysis

Daniil Lisik, Athina Ioannidou, Gregorio Paolo Milani, Sungkutu Nyassi, Saliha Selin Özüygür Ermis, Giulia Spolidoro, Emma Goksör, Göran Wennergren, Bright I Nwaru

### Appendix 3: Data Extraction Form

|                                                                                                                                                                                                           |                                                                       |
|-----------------------------------------------------------------------------------------------------------------------------------------------------------------------------------------------------------|-----------------------------------------------------------------------|
| Reviewer (initials)                                                                                                                                                                                       |                                                                       |
| Date of data extraction (yyyy-mm-dd)                                                                                                                                                                      |                                                                       |
| <b>General information</b>                                                                                                                                                                                |                                                                       |
| Author (for first author: surname, given name(s))                                                                                                                                                         |                                                                       |
| Title of article                                                                                                                                                                                          |                                                                       |
| Year of publication                                                                                                                                                                                       |                                                                       |
| Country of origin of study                                                                                                                                                                                |                                                                       |
| Contact information to author(s)                                                                                                                                                                          |                                                                       |
| <b>Study characteristics</b>                                                                                                                                                                              |                                                                       |
| Study design                                                                                                                                                                                              |                                                                       |
| Study aims/objectives                                                                                                                                                                                     |                                                                       |
| Exposure(s) (for each exposure: 1) method(s) of assessment; 2) objectivity of assessment (objective/subjective <sup>1</sup> ); 3) validity (yes <sup>2</sup> /no); 4) reliability (yes <sup>3</sup> /no)) |                                                                       |
| Outcome(s) (for each outcome: 1) method(s) of assessment; 2) objectivity (objective/subjective <sup>4</sup> ); 3) validity (yes <sup>2</sup> /no); 4) reliability (yes <sup>3</sup> /no))                 |                                                                       |
| Follow-up (method; length)                                                                                                                                                                                | Method:<br>Length:<br><br>Or: <input type="checkbox"/> not applicable |
| Study was conducted during (year(s))                                                                                                                                                                      |                                                                       |
| <b>Participant selection</b>                                                                                                                                                                              |                                                                       |
| Inclusion criteria                                                                                                                                                                                        |                                                                       |
| Exclusion criteria                                                                                                                                                                                        |                                                                       |
| Source(s) of subjects                                                                                                                                                                                     |                                                                       |
| <b>Population characteristics</b>                                                                                                                                                                         |                                                                       |
| Participants recruited (n; details)                                                                                                                                                                       | n:<br>Details:                                                        |

|                                                                                                                                                                                                                                                               |                                                                                                  |
|---------------------------------------------------------------------------------------------------------------------------------------------------------------------------------------------------------------------------------------------------------------|--------------------------------------------------------------------------------------------------|
| Participants eligible (n; % of “Participants recruited”; eligibility criteria)                                                                                                                                                                                | n:<br>% of “Participants recruited”:<br>Eligibility criteria:                                    |
| Participants included (n; % of “Participants eligible”)                                                                                                                                                                                                       | n:<br>% of “Participants eligible”:<br><br>Or:                                                   |
| Participants completing follow-up (n; % of “Participants included”)                                                                                                                                                                                           | n:<br>% of “Participants included”:<br><br>Or:                                                   |
| Participants lost (n; % of “Participants included”; details; how it was dealt with)                                                                                                                                                                           | n:<br>% of “Participants included”:<br>Details:<br>How it was dealt with:<br><br>Or:             |
| Data lost (n; % of “Participants included”; details; how it was dealt with)                                                                                                                                                                                   | n:<br>% of “Participants included”:<br>Details:<br>How it was dealt with:                        |
| Participants characteristics (for each group: 1) $n_{total}$ ; 2) age (mean (SD)); 3) gender distribution ( $n_{males}$ (% of $n_{total}$ )); 4) ethnicity; 5) country; 6) economic classification of country by the World Bank; 7) setting; 8) co-morbidity) |                                                                                                  |
| <b>Results</b>                                                                                                                                                                                                                                                |                                                                                                  |
| Outcomes (for each outcome for each exposure, stratified by group <sup>5</sup> if applicable: 1) n (% of $n_{group}$ ); 2) effect size (measure of effect) 95% CI; 3) p-value)                                                                                |                                                                                                  |
| <b>Analysis</b>                                                                                                                                                                                                                                               |                                                                                                  |
| Statistical analysis method                                                                                                                                                                                                                                   |                                                                                                  |
| Confounders (what confounders were identified; how they were controlled for; % of confounders controlled for)                                                                                                                                                 | Confounders identified:<br>How they were controlled for:<br><br>% of confounders controlled for: |
| Free-text interpretation of findings/conclusion                                                                                                                                                                                                               |                                                                                                  |
| Generalizability (is it likely that individuals selected for this study to be representative of the target population?)                                                                                                                                       |                                                                                                  |
| <b>Miscellaneous</b>                                                                                                                                                                                                                                          |                                                                                                  |
| Other comments/notes                                                                                                                                                                                                                                          |                                                                                                  |

|                                                                                                                                                                       |  |
|-----------------------------------------------------------------------------------------------------------------------------------------------------------------------|--|
| <b>Quality assessment (based on the Effective Public Health Practice Project (EPHPP) quality assessment tool<sup>6</sup>)</b>                                         |  |
| <b>(A) Selection bias</b>                                                                                                                                             |  |
| (Q1) Is it likely that individuals selected for this study to be representative of the target population?                                                             |  |
| (Q2) How many of eligible individuals agreed to participate in the study? (%)                                                                                         |  |
| Section rating                                                                                                                                                        |  |
| <b>(B) Study design</b>                                                                                                                                               |  |
| Indicate the design of the study                                                                                                                                      |  |
| Was the study setting randomized? If “No”, go to (C)                                                                                                                  |  |
| If “Yes”, was the randomization method described?                                                                                                                     |  |
| If “Yes”, was the method referred to above appropriate?                                                                                                               |  |
| Section rating<br>Rate longitudinal studies as “moderate”, and cross-sectional studies as “weak”                                                                      |  |
| <b>(C) Confounders</b>                                                                                                                                                |  |
| (Q1) Did the groups have significant differences in relation to each other prior to the intervention?                                                                 |  |
| (Q2) If “Yes”, indicate how many relevant confounders that were controlled for in any way (e.g. in study design through matching, stratification, or in analysis) (%) |  |
| Section rating<br>Rate studies without a control group as weak                                                                                                        |  |
| <b>(D) Blinding</b>                                                                                                                                                   |  |
| (Q1) Did the outcome assessor(s) know about the exposure status of the participants?                                                                                  |  |
| (Q2) Did the participants of the study know about the research question?                                                                                              |  |
| Section rating<br>Rate as “weak” if Q1 is 1 and Q2 is 3                                                                                                               |  |
| <b>(E) Data collection methods</b>                                                                                                                                    |  |
| (Q1) Were the tools used for data collection shown to be valid?                                                                                                       |  |
| (Q2) Were the tools used for data collection shown to be reliable?                                                                                                    |  |

|                                                                                                                  |  |
|------------------------------------------------------------------------------------------------------------------|--|
| Section rating                                                                                                   |  |
| <b>(F) Withdrawals and drop-outs</b>                                                                             |  |
| (Q1) Did numbers and/or reasons for withdrawals and drop-outs per group get documented?                          |  |
| (Q2) How many participants completed the study (if the value is different between groups, state the lowest)? (%) |  |
| Section rating                                                                                                   |  |
| <b>Global rating</b>                                                                                             |  |
| Did the two reviewers give different section ratings for A-F?                                                    |  |
| If “Yes”, what is the reason for the difference(s)?                                                              |  |
| <b>Final rating of both reviewers</b>                                                                            |  |

<sup>1</sup> Objective: medical records/official statistics. Subjective: self-report, observation.

<sup>2</sup> Yes: The assessment gives usable, meaningful information for the research question.

<sup>3</sup> Yes: Results from assessment type are consistent and stable.

<sup>4</sup> Objective: ICD code, verified diagnosis based on medical examination. Subjective: otherwise observed or self-reported symptoms/disease.

<sup>5</sup> Applicable if specific stratification has been made in the analysis, e.g. significant differences and/or calculations based on gender of participants.

<sup>6</sup> Modified version of EPHPP [1]. Original tool is available at: <https://www.ephpp.ca/quality-assessment-tool-for-quantitative-studies/>. The questions and answer alternatives are modified in phrasing for readability and the nature of relevant studies. Modifications of rating are clarified in **green text** above, based on the modifications of EPHPP done in a systematic review by Smith et al. in 2017 [2].

## References

1. Armijo-Olivo S, Stiles CR, Hagen NA, Biondo PD, Cummings GG. Assessment of study quality for systematic reviews: a comparison of the Cochrane Collaboration Risk of Bias Tool and the Effective Public Health Practice Project Quality Assessment Tool: methodological research. *J Eval Clin Pract.* 2012;18(1):12-18.
2. Smith M, Hosking J, Woodward A, Witten K, MacMillan A, Field A, et al. Systematic literature review of built environment effects on physical activity and active transport – an update and new findings on health equity. *International Journal of Behavioral Nutrition and Physical Activity.* 2017;14(1):158.
